# Supplementary material for: Syn-kinematic hydration reactions, dissolution-precipitation creep and grain boundary sliding in experimentally deformed plagioclase-pyroxene mixtures
Source: Copernicus journal article supplement (doi:10.5194/se-2018-39), 2018-05-07
Supplement: Supplementary file 1 [file se-2018-39-supplement.pdf]

Supplementary Table 1: Representative EDS measurements for mineral chemistry of amphiboles and plagioclase from experiments performed at Pc = 1.0 GPa on Maryland Diabase. Mineral chemistries are given as oxide wt%, calculated mineral formula, and mole-% of elements. “Newly grown” plagioclase denotes to fine-grained plagioclase grown in shear bands.

| norm. to 98%          |               |                  |               |               | norm to 100%          |               |               |
|-----------------------|---------------|------------------|---------------|---------------|-----------------------|---------------|---------------|
|                       |               | <b>Amphibole</b> |               |               | <b>Plagioclase</b>    |               |               |
| <b>Sample nr:</b>     | 414           | 414              | 490           | 490           | 100%                  | MD starting   | Newly         |
| <b>wt.-%</b>          | Tschermak.    | Mg Hornbl        | Mg Hornbl     | Tschermak.    | <b>wt.-%</b>          | material      | grown         |
| SiO2                  | 45.18         | 45.72            | 47.76         | 47.31         | SiO2                  | 51.86         | 50.38         |
| Al2O3                 | 17.13         | 14.13            | 13.06         | 17.73         | Al2O3                 | 29.92         | 29.69         |
| CaO                   | 9.24          | 8.92             | 9.45          | 10.02         | CaO                   | 13.39         | 9.66          |
| Na2O                  | 1.63          | 1.74             | 2.12          | 1.84          | Na2O                  | 3.63          | 9.13          |
| K2O                   | 1.26          | 0.86             | 0.89          | 0.90          | K2O                   | 0.26          | 0.55          |
| MgO                   | 7.56          | 9.95             | 11.24         | 7.39          | MgO                   | 0.00          | 0.00          |
| TiO2                  | 0.00          | 1.78             | 0.00          | 0.00          | TiO2                  | 0.00          | 0.00          |
| FeO                   | 15.99         | 14.90            | 13.48         | 12.81         | FeO                   | 0.94          | 0.58          |
| MnO                   | 0.00          | 0.00             | 0.00          | 0.00          | MnO                   | 0.00          | 0.00          |
| Cr2O3                 | 0.00          | 0.00             | 0.00          | 0.00          | Cr2O3                 | 0.00          | 0.00          |
| <b>Total:</b>         | <b>97.99</b>  | <b>98.00</b>     | <b>97.99</b>  | <b>98.00</b>  | <b>Total:</b>         | <b>100.00</b> | <b>100.00</b> |
| Formula per 23 oxygen |               |                  |               |               | Formula per 23 oxygen |               |               |
| Si                    | 6.59          | 6.76             | 6.89          | 6.77          | Si                    | 2.36          | 2.51          |
| Ti                    | 0.00          | 0.00             | 0.00          | 0.00          | Ti                    | 0.00          | 0.00          |
| Al                    | 2.95          | 2.46             | 2.22          | 2.99          | Al                    | 1.61          | 1.48          |
| Fe3+                  | 0.00          | 0.00             | 0.00          | 0.00          | Fe3+                  | 0.00          | 0.00          |
| Cr                    | 0.00          | 0.00             | 0.00          | 0.00          | Cr                    | 0.00          | 0.00          |
| Mg                    | 1.65          | 2.19             | 2.42          | 1.58          | Mg                    | 0.00          | 0.00          |
| Ca                    | 1.45          | 1.41             | 1.46          | 1.54          | Ca                    | 0.65          | 0.48          |
| Mn                    | 0.00          | 0.00             | 0.00          | 0.00          | Mn                    | 0.00          | 0.00          |
| Fe2+                  | 1.95          | 1.84             | 1.63          | 1.53          | Fe2+                  | 0.04          | 0.03          |
| Na                    | 0.46          | 0.50             | 0.59          | 0.51          | Na                    | 0.32          | 0.46          |
| K                     | 0.23          | 0.16             | 0.16          | 0.16          | K                     | 0.02          | 0.03          |
| <b>Total</b>          | <b>15.28</b>  | <b>15.34</b>     | <b>15.38</b>  | <b>15.08</b>  | <b>Total</b>          | <b>5.00</b>   | <b>4.99</b>   |
| <b>mol-%</b>          |               |                  |               |               | <b>mol-%</b>          |               |               |
| Si                    | 43.16         | 44.09            | 44.82         | 44.89         | Si                    | 47.31         | 50.38         |
| Ti                    | 0.00          | 0.00             | 0.00          | 0.00          | Ti                    | 0.00          | 0.00          |
| Al                    | 19.29         | 16.06            | 14.45         | 19.83         | Al                    | 32.17         | 29.69         |
| Fe3+                  | 0.00          | 0.00             | 0.00          | 0.00          | Fe3+                  | 0.00          | 0.00          |
| Cr                    | 0.00          | 0.00             | 0.00          | 0.00          | Cr                    | 0.00          | 0.00          |
| Mg                    | 10.77         | 14.30            | 15.73         | 10.45         | Mg                    | 0.00          | 0.00          |
| Ca                    | 9.46          | 9.22             | 9.50          | 10.19         | Ca                    | 13.09         | 9.66          |
| Mn                    | 0.00          | 0.00             | 0.00          | 0.00          | Mn                    | 0.00          | 0.00          |
| Fe2+                  | 12.77         | 12.02            | 10.58         | 10.17         | Fe2+                  | 0.72          | 0.58          |
| Na                    | 3.02          | 3.25             | 3.86          | 3.39          | Na                    | 6.42          | 9.13          |
| K                     | 1.54          | 1.06             | 1.07          | 1.09          | K                     | 0.30          | 0.55          |
| <b>Total</b>          | <b>100.00</b> | <b>100.00</b>    | <b>100.00</b> | <b>100.00</b> | <b>Total</b>          | <b>100.00</b> | <b>100.00</b> |
